# Supplementary material for: Evaluating the relationship between Clinical G6PD enzyme activity and gene variants
Source: PeerJ. 2024 Jan 3;12:e16554. doi: 10.7717/peerj.16554 (PMC10771088; doi:10.7717/peerj.16554)
Supplement: Supplemental Information 1 [file peerj-12-16554-s001.xlsx]

## Sheet: Sheet1
c.95G>A	c.871G>A	c.517T>C	c.1388 G>A	c.1376 G>T	c.1024C>T	c.392G>T
1.4	0.1	2.02	1.7	0.4	2.99	2.07
1.4	1.8	1.95	3.2	0.8	2.95	2.53
2.6	1.92	1.8	2	1.1	1.25	3.15
1.95	1.8	2.65	2	0.2	4.04	5.37
1.98	1.56	3.42	0.9	0.7	2.67	1.53
2.16	1.68	3.05	1.1	1.1	4.48	5.63
2.48	1.73		1.7	1	4.55	4.36
1.47	0.8		1.1	0.6	3.02	2.05
1.61	0.3		0.9	0.5	3.44
2.28	1.1		0.4	0.6	2.8
2.12	2.56		0.3	0.9	6.34
2.15	2.68		2.2	1.7	8.73
0.5	3.69		0.1	0.3	10.52
0.4	2.42		1.6	0.3
0.1	2.2		1.5	1.4
2.67			2.5	1.73
2.18			0.6	1.71
1.87			1.8
2.09			1.6	1.92
3.61			2.08	2.27
2.12			1.84	1.72
2.59			1.95	1.85
2.69			1.7	2.27
3.68			1.6	1.85
1.98			1.72	1.95
1.36			1.77	1.6
4.12			2.35	1.61
1.93			2.48	2.21
2.08			2.18	2.16
2.13			2.24	1.37
			1.98	2.32
			2.48	2.43
			1.65	1.71
			1.53	1.81
			2.57	2.14
			2.25	1.87
			2.31	2.28
			2.23	1.68
			1.25	2.13
			1.29	2.28
			1.23	2.43
			2.2	1.84
			1.91	1.14
			2.2	2.14
			1.65	2.2
			1.58	1.4
			1.68	2.03
			1.76	1.82
			2.15	2.24
			1.69	2.24
			2.09	2.17
			1.81	2.2
			1.56	1.92
			3.03	2.85
			2.05	3.43
			2.51	1.61
			2.36	2.31
			1.78	6.31
			1.63	1.92
			1.5	2.02
			1.1	2.14
			0.4	1.81
			0.2	1.86
			1.1	2.57
			1.4	0.1
			0.3	0.4
			0.4	1
			1.4	0.6
			0.9	1.1
			0.8	0.9
			2.11	1.88
			1.73	2.36
			1.9	2.42
			1.77	2.16
			6.36	3.02
			2.53	3.25
			3.6	2.12
			2.26	4.21
			2.44	3.86
			2.07	2.67
			2.66	1.56
			3.28	4.23
			2.36	4.23
			3.21	1.86
			3.01	2.34
			3.78	2.03
			2.12	11.26
			3.52	1.36
			3.56	1.67
			3.58	1.16
			3.59	2.03
			1.86	3.12
			2.53	2.31
			1.95	0.7
			1.69	0.5
			2.42	2.95
			1.73	5.43
			1.45	1.2
			1.54
			1.57
			1.52
			1.98
			1.68
			2.37
			3.28
			3.24
			2.32
			5.07

## Sheet: Sheet2
c.95G>A	c.871G>A	c.1388 G>A	c.1376 G>T	c.1024C>T	c.392G>T
14.15	6.8	2.7		8.1	8.08
5.8	6.5	10.38	11.28	7.2
8.4	9.75	25.7	21.65	4.9	8.5
5.2	4.7	12.14		4.4	4.7
10.7	7.8	9.28	3.57	22.15	6
8.5	8.4	9.8	15.14		7
6.3	14.02	10.1	7.1		21.34
10.87	13.25	10.6	6.2		19.89
5.4	18.56	9.6	9.8		19.73
4.1	15.12	7.6	10.5		20.41
11.42	10.58	4.3	8.8
8.06	22.56	9	7.8
29.53		8.4
20.45		11.1	9.8
22.89		5.6	10.3
15.21		7.6	5.07
8.65		5.3	5.2
22.12		7.3	6.5
		10.9	4.6
		7.3	10.4
		4.6	4.2
		5.7	5.5
		6	19.58
		4.8	22.8
		7.8	17.16
		3.9	13.68
		6.36	14.43
		21.98	18.75
		18.98	17.98
		22.14	20.52
		18.53	13.45
		14.12	9.56
		17.62	14.12
		13.19	19.25
		22.14	20.96
		19.58	9.66
		24.67	13.49
		24.87
		21.46
		22.16
		20.56
		21.02

## Sheet: Sheet3
heterozygous	hemizygous	double heterozygote
14.15	1.4	2.24
5.8	1.4	1.1
8.4	2.6	3.67
5.2	1.95	1.7
10.7	1.98	0.2
8.5		1.7
6.3	2.16	0.9
10.87	2.48	1.17
5.4	1.47	1.44
4.1	1.61	1.48
11.42	2.28	1.7
8.06	2.12	2.15
29.53	2.15	2.18
20.45	0.5	2.25
22.89	0.4	2.27
15.21	0.1	2.39
8.65	2.67	2.42
22.12	2.18	2.52
6.8	1.87	2.56
6.5	2.09	2.77
9.75	3.61	3.1
4.7	2.12	3.27
7.8	2.59	3.48
8.4	2.69	3.53
14.02	3.68	3.56
13.25	1.98	3.76
18.56	1.36	3.83
15.12	4.12	4.14
10.58	1.93	4.14
22.56	2.08	4.38
9.9	2.13	4.5
2.8	0.1	8.87
12.41	1.8	8.87
2.7	1.92	2.24
10.38	1.8	1.1
25.7	1.56	3.67
12.14	1.68	1.7
9.28	1.73	0.2
9.8	0.8	1.7
10.1	0.3	0.9
10.6	1.1	1.17
9.6	2.56	1.44
7.6	2.68	1.48
4.3	3.69	1.7
9	2.42	2.15
8.4	2.2	2.18
11.1	2.02	2.25
5.6	1.95	2.27
7.6	1.8	2.39
5.3	2.65	2.42
7.3	3.42	2.52
10.9	3.05	2.56
7.3	1.7	2.77
4.6	3.2	3.1
5.7	2	3.27
6	2	3.48
4.8	0.9	3.53
7.8	1.1	3.56
3.9	1.7	3.76
6.36	1.1	3.83
21.98	0.9	4.14
18.98	0.4	4.14
22.14	0.3	4.38
18.53	2.2	4.5
14.12	0.1	8.87
17.62	1.6	8.87
13.19	1.5	1.4
22.14	2.5	3.62
19.58	0.6	2.3
24.67	1.8	0.4
24.87	1.6	0.9
21.46	2.08	1.23
22.16	1.84	2.72
20.56	1.95	1.38
21.02	1.7	1.23
	1.6	1.38
11.28	1.72	2.39
21.65	1.77	2.72
		0.6
3.57	2.35	0.7
15.14	2.48	1.99
7.1	2.18	15.42
6.2	2.24	2.5
9.8	1.98	1.73
10.5	2.48	3.83
8.8	1.65	1.64
7.8	1.53	1.67
	2.57	1.73
9.8	2.25	1.88
10.3	2.31	1.88
5.07	2.23	2.52
5.2	1.25	2.65
6.5	1.29	2.71
4.6	1.23	3.44
10.4	2.2	3.88
4.2	1.91	4.09
5.5	2.2	4.14
19.58	1.65	4.23
22.8	1.58	2.89
17.16	1.68	1.4
13.68	1.76	2.16
14.43	2.15	2.16
18.75	1.69	2.92
17.98	2.09	4.32
20.52	1.81	4.92
13.45	1.56	12.46
9.56	3.03	9.2
14.12	2.05	2.22
19.25	2.51	4.87
20.96	2.36	4.6
9.66	1.78	4.95
13.49	1.63	6.17
8.1	1.5
7.2	1.1
4.9	0.4
4.4	0.2
22.15	1.1
8.08	1.4
	0.3
8.5	0.4
4.7	1.4
6	0.9
7	0.8
21.34	2.11
19.89	1.73
19.73	1.9
20.41	1.77
	6.36
	2.53
	3.6
	2.26
	2.44
	2.07
	2.66
	3.28
	2.36
	3.21
	3.01
	3.78
	2.12
	3.52
	3.56
	3.58
	3.59
	1.86
	2.53
	1.95
	1.69
	2.42
	1.73
	1.45
	1.54
	1.57
	1.52
	1.98
	1.68
	2.37
	3.28
	3.24
	2.32
	5.07
	0.4
	0.8
	1.1
	0.2
	0.7
	1.1
	1
	0.6
	0.5
	0.6
	0.9
	1.7
	0.3
	0.3
	1.4
	1.73
	1.71
	1.92
	2.27
	1.72
	1.85
	2.27
	1.85
	1.95
	1.6
	1.61
	2.21
	2.16
	1.37
	2.32
	2.43
	1.71
	1.81
	2.14
	1.87
	2.28
	1.68
	2.13
	2.28
	2.43
	1.84
	1.14
	2.14
	2.2
	1.4
	2.03
	1.82
	2.24
	2.24
	2.17
	2.2
	1.92
	2.85
	3.43
	1.61
	2.31
	6.31
	1.92
	2.02
	2.14
	1.81
	1.86
	2.57
	0.1
	0.4
	1
	0.6
	1.1
	0.9
	1.88
	2.36
	2.42
	2.16
	3.02
	3.25
	2.12
	4.21
	3.86
	2.67
	1.56
	4.23
	4.23
	1.86
	2.34
	2.03
	11.26
	1.36
	1.67
	1.16
	2.03
	3.12
	2.31
	0.7
	0.5
	2.95
	5.43
	1.2
	2.99
	2.95
	1.25
	4.04
	2.67
	4.48
	4.55
	3.02
	3.44
	2.8
	6.34
	8.73
	10.52
	2.07
	2.53
	3.15
	5.37
	1.53
	5.63
	4.36
	2.05

## Sheet: Sheet4
c.1376 G>T＆c.1388 G>A	c.1376 G>T＆c.95 G>A	c.1388 G>A＆c.95 G>A	c.871G>A＆c.1376 G>T	c.1024C>T＆Others
2.24		0.6	2.89	9.2
1.1	1.4	0.7	1.4	2.22
3.67	3.62	1.99	2.16	4.87
1.7	2.3	15.42	2.16	4.6
0.2	0.4	2.5	2.92	4.95
1.7	0.9	1.73	4.32	6.17
0.9	1.23	3.83	4.92
1.17	2.72	1.64	12.46
1.44	1.38	1.67
1.48	1.23	1.73
1.7	1.38	1.88
2.15	2.39	1.88
2.18	2.72	2.52
2.25		2.65
2.27		2.71
2.39		3.44
2.42		3.88
2.52		4.09
2.56		4.14
2.77		4.23
3.1
3.27
3.48
3.53
3.56
3.76
3.83
4.14
4.14
4.38
4.5
8.87
8.87
